# Supplementary material for: Toscana Virus Isolated from Sandflies, Tunisia
Source: PubMed Central journal article supplement (PMC3559066; doi:10.3201/eid1902.121463), 2013-02
Supplement: 12-1463-Techapp_s1.pdf [file 12-1463-Techapp_s1.pdf]

# Toscana Virus Isolated from Sandflies, Tunisia

## Technical Appendix

Technical Appendix Table 1. Genetic pairwise distances between Tunisian Toscana virus (TOSV) strains and selected phleboviruses in large RNA segment.

| N  | Virus                           | 1                           | 2     | 3     | 4     | 5     | 6     | 7     | 8     | 9     | 10    | 11    | 12    | 13    | 14    | 15    | 16    | 17    | 18    | 19    | 20    | 21    | 22    | 23    | 24    | 25    | 26    | 27    | 28    | 29    |  |
|----|---------------------------------|-----------------------------|-------|-------|-------|-------|-------|-------|-------|-------|-------|-------|-------|-------|-------|-------|-------|-------|-------|-------|-------|-------|-------|-------|-------|-------|-------|-------|-------|-------|--|
|    |                                 | <i>Nucleotide sequences</i> |       |       |       |       |       |       |       |       |       |       |       |       |       |       |       |       |       |       |       |       |       |       |       |       |       |       |       |       |  |
| 1  | TOSV_Tunisia2010_T152_Complete  |                             | 0.002 | 0.039 | 0.067 | 0.146 | 0.146 | 0.179 | 0.147 | 0.269 | 0.328 | 0.299 | 0.333 | 0.338 | 0.266 | 0.289 | 0.271 | 0.284 | 0.284 | 0.423 | 0.413 | 0.369 | 0.418 | 0.383 | 0.399 | 0.356 | 0.383 | 0.380 | 0.482 | 0.575 |  |
| 2  | TOSV_Tunisie2010_T166_Partial   | 0.000                       |       | 0.059 | 0.059 | 0.166 | 0.168 | 0.179 | 0.156 | 0.301 | 0.328 | 0.301 | 0.333 | 0.338 | 0.275 | 0.289 | 0.271 | 0.284 | 0.284 | 0.423 | 0.413 | 0.390 | 0.418 | 0.390 | 0.399 | 0.358 | 0.384 | 0.368 | 0.501 | 0.588 |  |
| 3  | TOSV_ISS.Phl.3_NC_006319        | 0.012                       | 0.006 |       | 0.017 | 0.149 | 0.149 | 0.174 | 0.150 | 0.272 | 0.333 | 0.293 | 0.338 | 0.333 | 0.273 | 0.308 | 0.259 | 0.308 | 0.308 | 0.413 | 0.403 | 0.373 | 0.413 | 0.379 | 0.394 | 0.356 | 0.385 | 0.382 | 0.461 | 0.573 |  |
| 4  | TOSV_France_DQ1500590           | 0.011                       | 0.006 | 0.006 |       | 0.153 | 0.155 | 0.174 | 0.150 | 0.290 | 0.333 | 0.293 | 0.338 | 0.333 | 0.265 | 0.308 | 0.259 | 0.308 | 0.308 | 0.413 | 0.403 | 0.366 | 0.413 | 0.385 | 0.394 | 0.356 | 0.385 | 0.348 | 0.473 | 0.583 |  |
| 5  | TOSV_AR_France_DQ65607          | 0.032                       | 0.036 | 0.035 | 0.034 |       | 0.008 | 0.020 | 0.027 | 0.265 | 0.353 | 0.329 | 0.318 | 0.338 | 0.284 | 0.313 | 0.246 | 0.348 | 0.348 | 0.433 | 0.423 | 0.389 | 0.393 | 0.373 | 0.399 | 0.384 | 0.401 | 0.365 | 0.464 | 0.579 |  |
| 6  | TOSV_France_H/IMTSSA_FJ153281   | 0.031                       | 0.036 | 0.034 | 0.034 | 0.002 |       | 0.015 | 0.025 | 0.266 | 0.348 | 0.327 | 0.318 | 0.338 | 0.280 | 0.308 | 0.251 | 0.338 | 0.338 | 0.433 | 0.423 | 0.389 | 0.393 | 0.374 | 0.394 | 0.382 | 0.401 | 0.361 | 0.466 | 0.580 |  |
| 7  | TOSV_ESPh-GR79_GU183147         | 0.030                       | 0.030 | 0.015 | 0.015 | 0.000 | 0.000 |       | 0.020 | 0.353 | 0.353 | 0.353 | 0.318 | 0.328 | 0.333 | 0.303 | 0.259 | 0.338 | 0.333 | 0.438 | 0.428 | 0.428 | 0.398 | 0.433 | 0.408 | 0.408 | 0.478 | 0.438 | 0.542 | 0.577 |  |
| 8  | TOSV_Spain_EsPhGR40_FJ153280    | 0.031                       | 0.036 | 0.034 | 0.034 | 0.003 | 0.003 | 0.000 |       | 0.268 | 0.343 | 0.337 | 0.318 | 0.338 | 0.286 | 0.294 | 0.244 | 0.333 | 0.333 | 0.443 | 0.433 | 0.393 | 0.403 | 0.378 | 0.390 | 0.378 | 0.399 | 0.368 | 0.471 | 0.573 |  |
| 9  | Massilia_W_EU725771             | 0.178                       | 0.196 | 0.181 | 0.198 | 0.176 | 0.176 | 0.269 | 0.175 |       | 0.030 | 0.042 | 0.358 | 0.333 | 0.293 | 0.368 | 0.279 | 0.343 | 0.348 | 0.413 | 0.403 | 0.360 | 0.398 | 0.332 | 0.394 | 0.349 | 0.375 | 0.417 | 0.487 | 0.580 |  |
| 10 | Massilia_BP_DQ656073            | 0.254                       | 0.254 | 0.269 | 0.269 | 0.284 | 0.284 | 0.284 | 0.284 | 0.015 |       | 0.000 | 0.338 | 0.318 | 0.343 | 0.368 | 0.313 | 0.338 | 0.343 | 0.403 | 0.393 | 0.393 | 0.398 | 0.328 | 0.413 | 0.413 | 0.443 | 0.468 | 0.552 | 0.577 |  |
| 11 | Massilia_BM_DQ656072            | 0.202                       | 0.202 | 0.208 | 0.208 | 0.220 | 0.220 | 0.284 | 0.220 | 0.006 | 0.000 |       | 0.338 | 0.318 | 0.293 | 0.368 | 0.277 | 0.338 | 0.343 | 0.403 | 0.393 | 0.366 | 0.398 | 0.347 | 0.408 | 0.362 | 0.380 | 0.398 | 0.515 | 0.594 |  |
| 12 | PNQV_P6B2_2008_GQ165519         | 0.269                       | 0.269 | 0.254 | 0.254 | 0.254 | 0.254 | 0.254 | 0.254 | 0.239 | 0.239 |       | 0.055 | 0.398 | 0.323 | 0.333 | 0.398 | 0.398 | 0.468 | 0.458 | 0.458 | 0.468 | 0.428 | 0.453 | 0.453 | 0.458 | 0.458 | 0.542 | 0.562 |       |  |
| 13 | PNQV_P1B4_2008_FJ848989         | 0.239                       | 0.239 | 0.224 | 0.224 | 0.224 | 0.224 | 0.224 | 0.224 | 0.239 | 0.239 | 0.045 |       | 0.388 | 0.318 | 0.318 | 0.388 | 0.388 | 0.473 | 0.463 | 0.463 | 0.473 | 0.408 | 0.443 | 0.443 | 0.453 | 0.458 | 0.552 | 0.547 |       |  |
| 14 | SFNV_Poona_EF095548             | 0.180                       | 0.185 | 0.186 | 0.181 | 0.186 | 0.186 | 0.254 | 0.186 | 0.230 | 0.358 | 0.232 | 0.328 | 0.328 |       | 0.249 | 0.267 | 0.010 | 0.000 | 0.428 | 0.418 | 0.349 | 0.433 | 0.360 | 0.418 | 0.362 | 0.409 | 0.354 | 0.501 | 0.586 |  |
| 15 | SFNV_30451_GQ165528             | 0.224                       | 0.224 | 0.209 | 0.209 | 0.194 | 0.194 | 0.194 | 0.194 | 0.358 | 0.343 | 0.343 | 0.284 | 0.284 | 0.090 |       | 0.249 | 0.249 | 0.249 | 0.493 | 0.483 | 0.483 | 0.463 | 0.433 | 0.428 | 0.428 | 0.433 | 0.473 | 0.527 | 0.552 |  |
| 16 | TEHV_I_47_GQ165522              | 0.143                       | 0.143 | 0.143 | 0.143 | 0.149 | 0.149 | 0.119 | 0.149 | 0.190 | 0.299 | 0.196 | 0.299 | 0.269 | 0.155 | 0.164 |       | 0.294 | 0.294 | 0.458 | 0.458 | 0.414 | 0.443 | 0.352 | 0.455 | 0.368 | 0.392 | 0.370 | 0.497 | 0.572 |  |
| 17 | SFNV_Algeria_A5_GU183867        | 0.254                       | 0.254 | 0.269 | 0.269 | 0.269 | 0.269 | 0.269 | 0.269 | 0.373 | 0.358 | 0.358 | 0.328 | 0.328 | 0.015 | 0.104 | 0.224 |       | 0.010 | 0.438 | 0.428 | 0.428 | 0.443 | 0.428 | 0.433 | 0.433 | 0.468 | 0.478 | 0.557 | 0.602 |  |
| 18 | SFNV_Algeria_A6_GU183868        | 0.239                       | 0.239 | 0.254 | 0.254 | 0.254 | 0.254 | 0.254 | 0.254 | 0.373 | 0.358 | 0.358 | 0.328 | 0.328 | 0.000 | 0.090 | 0.209 | 0.015 |       | 0.428 | 0.418 | 0.418 | 0.433 | 0.428 | 0.428 | 0.428 | 0.468 | 0.483 | 0.562 | 0.597 |  |
| 19 | SFSV_Kabyliya_F16_GU183869      | 0.507                       | 0.507 | 0.507 | 0.507 | 0.507 | 0.507 | 0.507 | 0.507 | 0.433 | 0.433 | 0.433 | 0.537 | 0.522 | 0.522 | 0.537 | 0.493 | 0.522 | 0.522 |       | 0.020 | 0.010 | 0.075 | 0.388 | 0.274 | 0.274 | 0.279 | 0.438 | 0.507 | 0.612 |  |
| 20 | SFSV_Algeria_Ph_ariasi_EU240882 | 0.478                       | 0.478 | 0.463 | 0.463 | 0.463 | 0.463 | 0.463 | 0.463 | 0.418 | 0.418 | 0.418 | 0.507 | 0.493 | 0.507 | 0.493 | 0.463 | 0.507 | 0.507 | 0.060 |       | 0.010 | 0.075 | 0.388 | 0.274 | 0.274 | 0.279 | 0.438 | 0.527 | 0.617 |  |
| 21 | SFSV_Sabin_EF095551             | 0.389                       | 0.411 | 0.389 | 0.390 | 0.384 | 0.384 | 0.478 | 0.384 | 0.346 | 0.403 | 0.363 | 0.507 | 0.493 | 0.377 | 0.507 | 0.387 | 0.507 | 0.507 | 0.030 | 0.030 |       | 0.065 | 0.357 | 0.263 | 0.261 | 0.285 | 0.357 | 0.477 | 0.614 |  |
| 22 | Cyprus_virus_AY962268           | 0.478                       | 0.478 | 0.478 | 0.478 | 0.478 | 0.478 | 0.478 | 0.478 | 0.403 | 0.403 | 0.403 | 0.507 | 0.493 | 0.507 | 0.507 | 0.463 | 0.507 | 0.507 | 0.045 | 0.045 | 0.015 |       | 0.398 | 0.264 | 0.264 | 0.274 | 0.438 | 0.542 | 0.612 |  |
| 23 | RVFV_Smithburn_DQ375430         | 0.323                       | 0.333 | 0.318 | 0.322 | 0.328 | 0.328 | 0.403 | 0.328 | 0.292 | 0.358 | 0.315 | 0.418 | 0.418 | 0.344 | 0.463 | 0.327 | 0.478 | 0.478 | 0.388 | 0.373 | 0.319 | 0.358 |       | 0.380 | 0.354 | 0.383 | 0.361 | 0.487 | 0.577 |  |
| 24 | CHIOS_A_AY293623                | 0.479                       | 0.479 | 0.479 | 0.479 | 0.479 | 0.479 | 0.493 | 0.479 | 0.465 | 0.478 | 0.465 | 0.507 | 0.493 | 0.493 | 0.507 | 0.479 | 0.507 | 0.507 | 0.239 | 0.239 | 0.211 | 0.209 | 0.408 |       | 0.014 | 0.202 | 0.465 | 0.512 | 0.606 |  |
| 25 | CFUV_PA_Ar_814_GQ165521         | 0.381                       | 0.381 | 0.381 | 0.381 | 0.375 | 0.375 | 0.493 | 0.375 | 0.375 | 0.478 | 0.375 | 0.507 | 0.493 | 0.381 | 0.507 | 0.363 | 0.507 | 0.507 | 0.239 | 0.239 | 0.149 | 0.209 | 0.351 | 0.014 |       | 0.230 | 0.384 | 0.503 | 0.612 |  |
| 26 | Utique_P6B1_2008_GU233649       | 0.399                       | 0.399 | 0.399 | 0.399 | 0.399 | 0.399 | 0.507 | 0.399 | 0.381 | 0.478 | 0.381 | 0.522 | 0.507 | 0.399 | 0.522 | 0.393 | 0.522 | 0.522 | 0.239 | 0.239 | 0.185 | 0.194 | 0.333 | 0.056 | 0.089 |       | 0.397 | 0.496 | 0.598 |  |
| 27 | ARBV_Ph_1_35_M6_DQ862467        | 0.364                       | 0.327 | 0.364 | 0.316 | 0.364 | 0.364 | 0.448 | 0.364 | 0.379 | 0.507 | 0.351 | 0.522 | 0.507 | 0.328 | 0.493 | 0.315 | 0.522 | 0.522 | 0.552 | 0.522 | 0.384 | 0.522 | 0.355 | 0.563 | 0.423 | 0.440 |       | 0.499 | 0.602 |  |
| 28 | UUKV_NC_005214                  | 0.524                       | 0.560 | 0.524 | 0.542 | 0.529 | 0.529 | 0.657 | 0.529 | 0.524 | 0.657 | 0.571 | 0.672 | 0.657 | 0.563 | 0.687 | 0.577 | 0.672 | 0.672 | 0.672 | 0.701 | 0.557 | 0.672 | 0.518 | 0.662 | 0.595 | 0.583 | 0.570 |       | 0.580 |  |
| 29 | Gouleako_virus_F23_K1_EF423167  | 0.696                       | 0.719 | 0.701 | 0.710 | 0.701 | 0.701 | 0.701 | 0.701 | 0.723 | 0.746 | 0.743 | 0.731 | 0.716 | 0.703 | 0.731 | 0.725 | 0.716 | 0.716 | 0.791 | 0.791 | 0.770 | 0.791 | 0.723 | 0.746 | 0.749 | 0.754 | 0.755 | 0.720 |       |  |
|    |                                 | <i>Amino acid sequences</i> |       |       |       |       |       |       |       |       |       |       |       |       |       |       |       |       |       |       |       |       |       |       |       |       |       |       |       |       |  |

Technical Appendix Table 2. Genetic pairwise distances between Tunisian Toscana virus (TOSV) strains and selected phleboviruses in medium RNA segment.

| N°                          | Virus                          | 1     | 2     | 3     | 4     | 5     | 6     | 7     | 8     | 9     | 10    | 11    | 12    | 13    | 14    | 15    | 16    |
|-----------------------------|--------------------------------|-------|-------|-------|-------|-------|-------|-------|-------|-------|-------|-------|-------|-------|-------|-------|-------|
| <i>Nucleotide sequences</i> |                                |       |       |       |       |       |       |       |       |       |       |       |       |       |       |       |       |
| 1                           | TOSV_Tunisia2010_T152_Complete |       | 0.002 | 0.032 | 0.176 | 0.173 | 0.178 | 0.437 | 0.449 | 0.397 | 0.397 | 0.401 | 0.527 | 0.587 | 0.526 | 0.632 | 0.680 |
| 2                           | TOSV_Tunisie2010_T166_partial  | 0.010 |       | 0.022 | 0.175 | 0.177 | 0.177 | 0.434 | 0.449 | 0.415 | 0.402 | 0.419 | 0.530 | 0.550 | 0.526 | 0.614 | 0.655 |
| 3                           | TOSV_ISSPhI3_NC006320          | 0.073 | 0.040 |       | 0.182 | 0.179 | 0.183 | 0.437 | 0.437 | 0.399 | 0.395 | 0.392 | 0.523 | 0.590 | 0.527 | 0.631 | 0.678 |
| 4                           | TOSV_France_H/IMTSSA_FJ153284  | 0.423 | 0.374 | 0.427 |       | 0.007 | 0.055 | 0.434 | 0.416 | 0.394 | 0.405 | 0.404 | 0.527 | 0.580 | 0.543 | 0.629 | 0.681 |
| 5                           | TOSV_AR_France_EF65636         | 0.415 | 0.384 | 0.419 | 0.020 |       | 0.057 | 0.436 | 0.418 | 0.393 | 0.410 | 0.404 | 0.528 | 0.582 | 0.543 | 0.629 | 0.680 |
| 6                           | TOSV_Spain_EsPhGR40_FJ153283   | 0.432 | 0.404 | 0.428 | 0.150 | 0.154 |       | 0.443 | 0.416 | 0.396 | 0.414 | 0.416 | 0.530 | 0.585 | 0.552 | 0.627 | 0.678 |
| 7                           | Massilia_W_EU725772            | 0.728 | 0.722 | 0.732 | 0.732 | 0.733 | 0.743 |       | 0.243 | 0.431 | 0.397 | 0.413 | 0.559 | 0.583 | 0.566 | 0.625 | 0.677 |
| 8                           | PNQV_P1B4_2008_FJ848988        | 0.725 | 0.711 | 0.716 | 0.716 | 0.716 | 0.716 | 0.520 |       | 0.421 | 0.413 | 0.429 | 0.529 | 0.578 | 0.531 | 0.601 | 0.652 |
| 9                           | SFNV_Poona_HM566177            | 0.700 | 0.705 | 0.707 | 0.690 | 0.680 | 0.682 | 0.726 | 0.700 |       | 0.403 | 0.178 | 0.546 | 0.573 | 0.547 | 0.635 | 0.682 |
| 10                          | TEHV_I47_AY129732              | 0.619 | 0.646 | 0.619 | 0.657 | 0.667 | 0.657 | 0.670 | 0.696 | 0.713 |       | 0.378 | 0.525 | 0.563 | 0.558 | 0.623 | 0.650 |
| 11                          | SFNV_Sabin_AY129733            | 0.679 | 0.674 | 0.679 | 0.687 | 0.672 | 0.702 | 0.695 | 0.720 | 0.359 | 0.634 |       | 0.550 | 0.537 | 0.526 | 0.653 | 0.636 |
| 12                          | SFSV_91045I_AY129740           | 0.776 | 0.785 | 0.765 | 0.745 | 0.755 | 0.765 | 0.806 | 0.816 | 0.760 | 0.755 | 0.750 |       | 0.524 | 0.394 | 0.592 | 0.639 |
| 13                          | RVFV_NC_014396                 | 0.846 | 0.766 | 0.846 | 0.843 | 0.845 | 0.846 | 0.851 | 0.869 | 0.828 | 0.820 | 0.797 | 0.755 |       | 0.497 | 0.658 | 0.681 |
| 14                          | CFUV_PaAr814_AY129744          | 0.800 | 0.800 | 0.790 | 0.820 | 0.820 | 0.810 | 0.820 | 0.780 | 0.776 | 0.830 | 0.765 | 0.653 | 0.768 |       | 0.577 | 0.617 |
| 15                          | UUKV_NC_005220                 | 0.887 | 0.823 | 0.882 | 0.883 | 0.880 | 0.875 | 0.876 | 0.900 | 0.886 | 0.873 | 0.875 | 0.845 | 0.883 | 0.796 |       | 0.692 |
| 16                          | Gouleako_virus_A5CI_2004_HQ541 | 0.905 | 0.883 | 0.906 | 0.907 | 0.908 | 0.907 | 0.915 | 0.928 | 0.909 | 0.890 | 0.857 | 0.906 | 0.904 | 0.866 | 0.917 |       |
| <i>Amino acid sequences</i> |                                |       |       |       |       |       |       |       |       |       |       |       |       |       |       |       |       |



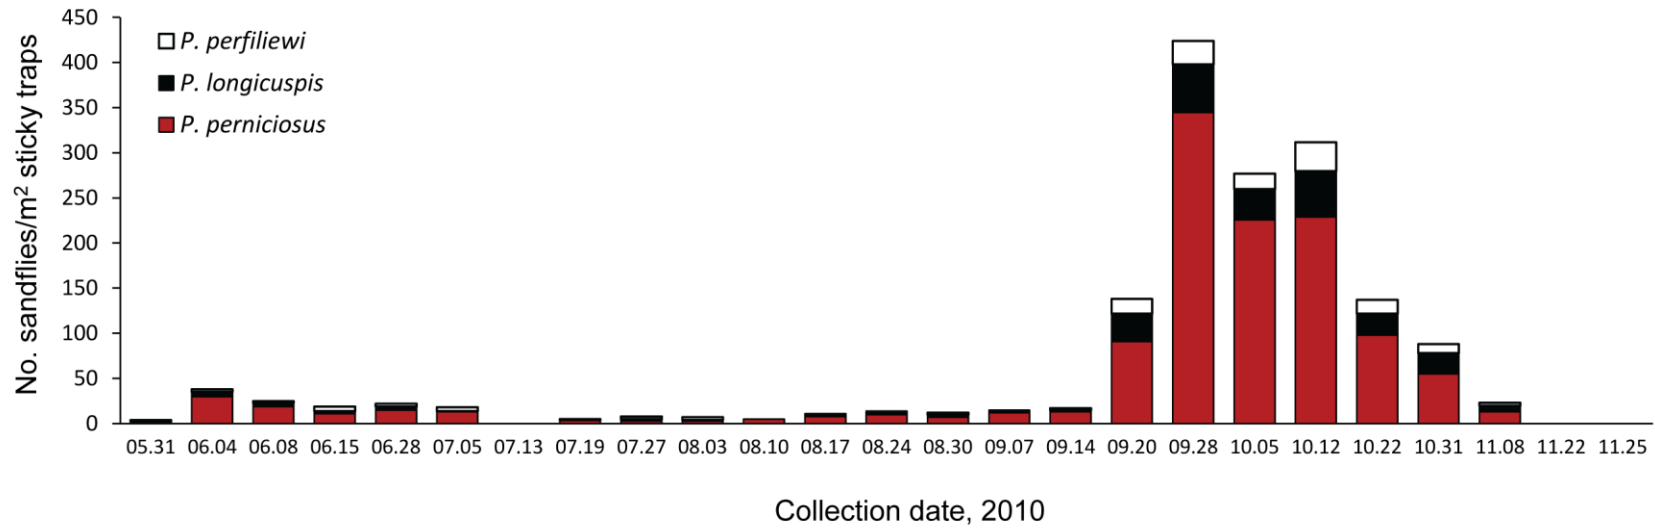

Technical Appendix Figure. Phenology of *Phlebotomus* spp. sandflies collected in Utique, Governorate of Bizerte, Tunisia, 2010.
